# Supplementary material for: Potent enantioselective inhibition of DNA-dependent protein kinase (DNA-PK) by atropisomeric chromenone derivatives
Source: Royal Society of Chemistry journal article supplement (doi:10.1039/c2ob26035b), 2012-01-01
Supplement: c2ob26035b.pdf [file c2ob26035b.pdf]

## Supplementary Electronic Information - Compound Purity

### Compound 6 (racemic):

Data File F:\HPLC DATA 2009\KH0309\030309\_ZAV\_RHT\_KMC\_SO 2009-03-03 15-56-38\030309\_22.D

Sample Name: KMC/01/55B

```
=====
Acq. Operator   : Karen Haggerty           Seq. Line :   22
Acq. Instrument : Instrument 1              Location  : Vial 62
Injection Date  : 3/4/2009 6:30:07 AM      Inj       :    1
                                           Inj Volume: 5.000 µl
Different Inj Volume from Sequence !      Actual Inj Volume : 10.000 µl
Acq. Method     : C:\CHEM32\1\DATA\KH0309\030309_ZAV_RHT_KMC_SO 2009-03-03 15-56-38\COL1-A2+
                                           B1-NO_REF.M
Last changed    : 3/2/2009 2:22:52 PM by Karen Haggerty
Analysis Method : F:\HPLC DATA 2009\KH0309\030309_ZAV_RHT_KMC_SO 2009-03-03 15-56-38\030309_
22.D\DA.M (COL1-A2+B1-NO_REF.M)
Last changed    : 7/10/2012 1:31:20 PM by Karen Haggerty
                 (modified after loading)
Method Info     : Waters XTerra RP18 5µm, 150 x 4.6mm
                 Scouting Gradient: 0.1% Formic Acid (aq)/MeCN, 1.0mL/min

Sample Info     : Waters XTerra RP18, 0.1% Formic Acid/MeCN
=====
```

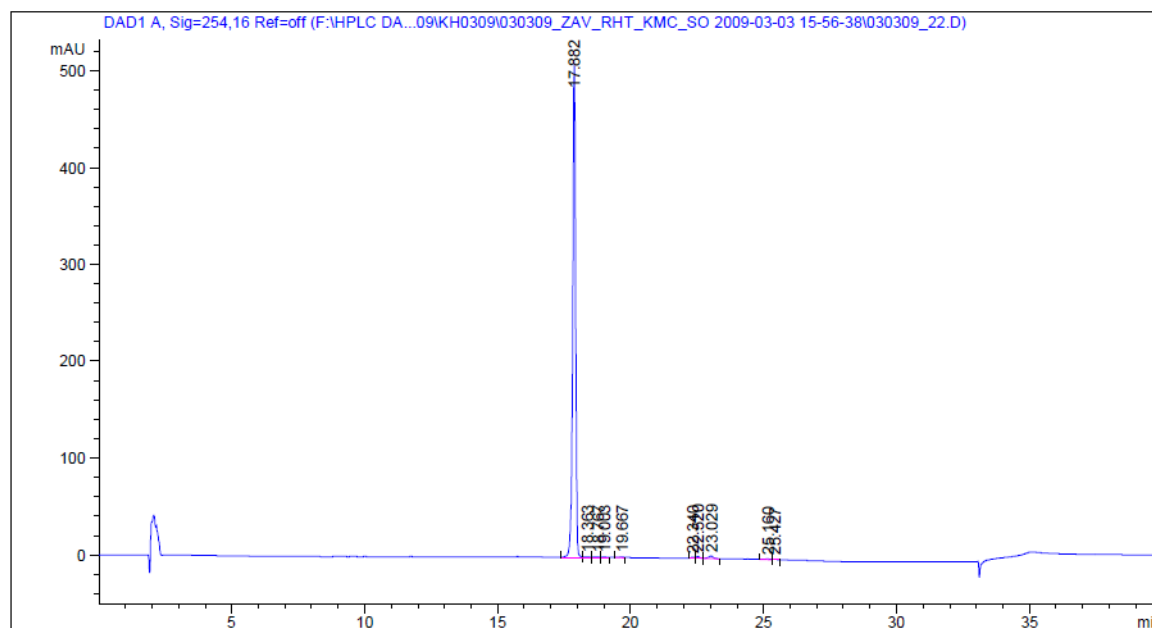

#### Area Percent Report

```
=====
Sorted By      :      Signal
Multiplier:    :      1.0000
Dilution:      :      1.0000
Use Multiplier & Dilution Factor with ISTDs
=====
```

Data File F:\HPLC DATA 2009\KH0309\030309\_ZAV\_RHT\_KMC\_SO 2009-03-03 15-56-38\030309\_22.D  
Sample Name: KMC/01/55B

Signal 1: DAD1 A, Sig=254,16 Ref=off

| Peak # | RetTime [min] | Type | Width [min] | Area [mAU*s] | Height [mAU] | Area %  |
|--------|---------------|------|-------------|--------------|--------------|---------|
| 1      | 17.882        | MF   | 0.1292      | 3942.02588   | 508.70929    | 97.3402 |
| 2      | 18.363        | FM   | 0.2250      | 7.82410      | 5.79520e-1   | 0.1932  |
| 3      | 18.767        | MF   | 0.2801      | 7.50323      | 4.46479e-1   | 0.1853  |
| 4      | 19.003        | FM   | 0.1542      | 6.55058      | 7.07867e-1   | 0.1618  |
| 5      | 19.667        | MF   | 0.1543      | 8.14050      | 8.79140e-1   | 0.2010  |
| 6      | 22.340        | MF   | 0.1563      | 9.69251      | 1.03321      | 0.2393  |
| 7      | 22.520        | FM   | 0.1673      | 20.32342     | 2.02418      | 0.5018  |
| 8      | 23.029        | VB   | 0.1771      | 33.09061     | 2.66081      | 0.8171  |
| 9      | 25.160        | MF   | 0.2001      | 8.54992      | 7.12002e-1   | 0.2111  |
| 10     | 25.427        | FM   | 0.1717      | 6.04023      | 5.86204e-1   | 0.1492  |

Totals : 4049.74097 518.33870

=====  
\*\*\* End of Report \*\*\*

## Compound 6 (-):

Data File F:\170609\_ABD\_KMC\_ZAV 2009-06-19 16-15-29\190609\_12.D

Sample Name: KMC-01-55.1

```
=====
Acq. Operator   : Karen Haggerty                Seq. Line :   12
Acq. Instrument : Instrument 1                  Location  : Vial 4
Injection Date  : 6/20/2009 12:12:22 AM         Inj       :    1
                                           Inj Volume: 5.000 µl
Acq. Method     : C:\CHEM32\1\DATA\KH0609\170609_ABD_KMC_ZAV 2009-06-19 16-15-29\COL1-A1+B1-
                  NO_REF.M
Last changed    : 4/22/2009 11:56:35 AM by Karen Haggerty
Analysis Method : F:\170609_ABD_KMC_ZAV 2009-06-19 16-15-29\190609_12.D\DA.M (COL1-A1+B1-NO_
                  REF.M)
Last changed    : 7/10/2012 12:37:42 PM by Karen Haggerty
                  (modified after loading)
Sample Info     : Waters XTerra RP18 0.1% Ammonia/MeCN
=====
```

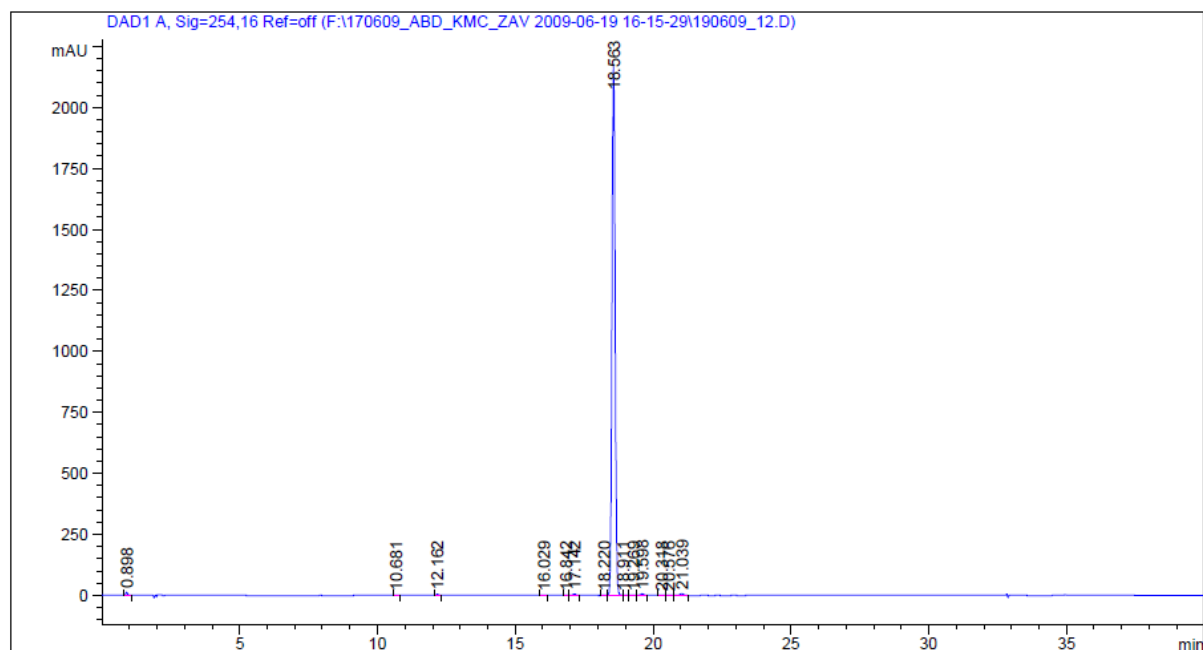

### Area Percent Report

```
=====
Sorted By      :      Signal
Multiplier:    :      1.0000
Dilution:      :      1.0000
Use Multiplier & Dilution Factor with ISTDs
=====
```

Signal 1: DAD1 A, Sig=254,16 Ref=off

| Peak # | RetTime [min] | Type | Width [min] | Area [mAU*s] | Height [mAU] | Area % |
|--------|---------------|------|-------------|--------------|--------------|--------|
| 1      | 0.898         | BB   | 0.0750      | 59.75949     | 12.67729     | 0.3364 |
| 2      | 10.681        | BB   | 0.0947      | 10.55932     | 1.69548      | 0.0594 |
| 3      | 12.162        | BB   | 0.0931      | 26.56115     | 4.35778      | 0.1495 |

Data File F:\190609\_ABD\_KMC\_2AV 2009-06-19 16-15-29\190609\_12.D  
Sample Name: KMC-01-55.1

| Peak # | RetTime [min] | Type | Width [min] | Area [mAU*s] | Height [mAU] | Area %  |
|--------|---------------|------|-------------|--------------|--------------|---------|
| 4      | 16.029        | BV   | 0.1248      | 10.72710     | 1.32057      | 0.0604  |
| 5      | 16.842        | FM   | 0.1535      | 5.02392      | 5.45324e-1   | 0.0283  |
| 6      | 17.142        | FM   | 0.1529      | 44.28368     | 4.82837      | 0.2493  |
| 7      | 18.220        | MF   | 0.1345      | 14.33136     | 1.77547      | 0.0807  |
| 8      | 18.563        | FM   | 0.1337      | 1.74143e4    | 2171.46973   | 98.0227 |
| 9      | 18.911        | MF   | 0.0928      | 9.74756      | 1.26616      | 0.0549  |
| 10     | 19.269        | MF   | 0.2169      | 13.50413     | 1.03780      | 0.0760  |
| 11     | 19.598        | MF   | 0.1584      | 64.15023     | 6.74896      | 0.3611  |
| 12     | 20.318        | MF   | 0.1754      | 8.57160      | 8.14614e-1   | 0.0482  |
| 13     | 20.576        | MF   | 0.1720      | 12.51498     | 1.21248      | 0.0704  |
| 14     | 21.039        | FM   | 0.1580      | 71.54507     | 7.54583      | 0.4027  |

Totals : 1.77656e4 2217.29583

=====  
\*\*\* End of Report \*\*\*

Compound 6 (+):

Data File F:\170609\_ABD\_KMC\_ZAV 2009-06-19 16-15-29\190609\_13.D  
Sample Name: KMC-01-55.2

```
=====
Acq. Operator   : Karen Haggerty                      Seq. Line :   13
Acq. Instrument : Instrument 1                        Location  : Vial 5
Injection Date  : 6/20/2009 12:53:54 AM                Inj       :    1
                                                Inj Volume: 5.000 µl
Acq. Method     : C:\CHEM32\1\DATA\KH0609\170609_ABD_KMC_ZAV 2009-06-19 16-15-29\COL1-A1+B1-
                  NO_REF.M
Last changed    : 4/22/2009 11:56:35 AM by Karen Haggerty
Analysis Method : F:\170609_ABD_KMC_ZAV 2009-06-19 16-15-29\190609_13.D\DA.M (COL1-A1+B1-NO_
                  REF.M)
Last changed    : 7/10/2012 12:39:00 PM by Karen Haggerty
                  (modified after loading)
Sample Info     : Waters XTerra RP18 0.1% Ammonia/MeCN
=====
```

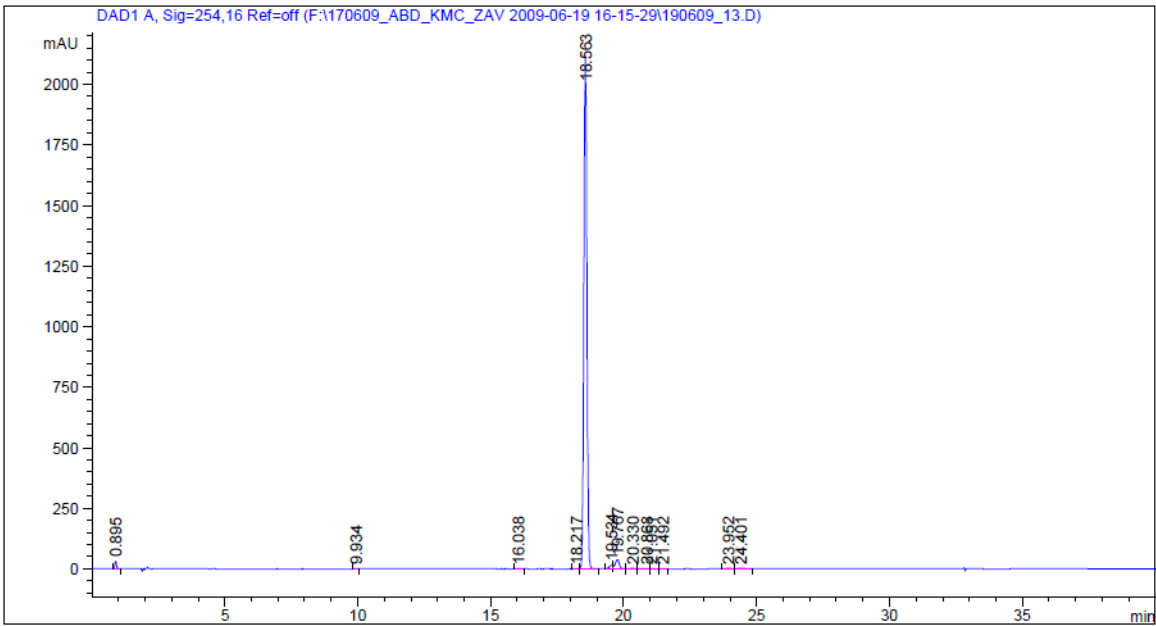

```
=====
                        Area Percent Report
=====

Sorted By      :      Signal
Multiplier:    :      1.0000
Dilution:      :      1.0000
Use Multiplier & Dilution Factor with ISTDs
```

Signal 1: DAD1 A, Sig=254,16 Ref=off

| Peak # | RetTime [min] | Type | Width [min] | Area [mAU*s] | Height [mAU] | Area % |
|--------|---------------|------|-------------|--------------|--------------|--------|
| 1      | 0.895         | BB   | 0.0713      | 137.81415    | 30.18388     | 0.7706 |
| 2      | 9.934         | BV   | 0.0798      | 6.27567      | 1.22361      | 0.0351 |
| 3      | 16.038        | BB   | 0.1334      | 12.76134     | 1.49822      | 0.0714 |

Data File F:\170609\_ABD\_KMC\_ZAV 2009-06-19 16-15-29\190609\_13.D  
Sample Name: KMC-01-55.2

| Peak # | RetTime [min] | Type | Width [min] | Area [mAU*s] | Height [mAU] | Area %  |
|--------|---------------|------|-------------|--------------|--------------|---------|
| 4      | 18.217        | FM   | 0.1381      | 18.05458     | 2.17968      | 0.1010  |
| 5      | 18.563        | FM   | 0.1342      | 1.69873e4    | 2109.65234   | 94.9866 |
| 6      | 19.534        | MF   | 0.1647      | 150.13290    | 15.19115     | 0.8395  |
| 7      | 19.767        | FM   | 0.1817      | 412.44241    | 37.83819     | 2.3062  |
| 8      | 20.330        | MF   | 0.1463      | 33.36186     | 3.80110      | 0.1865  |
| 9      | 20.868        | MF   | 0.2079      | 23.07872     | 1.85040      | 0.1290  |
| 10     | 21.051        | MF   | 0.1476      | 7.91707      | 8.94233e-1   | 0.0443  |
| 11     | 21.492        | FM   | 0.1666      | 6.33046      | 6.33310e-1   | 0.0354  |
| 12     | 23.952        | BV   | 0.1788      | 35.52439     | 3.07367      | 0.1986  |
| 13     | 24.401        | VB   | 0.2228      | 52.89526     | 3.33879      | 0.2958  |

Totals : 1.78839e4 2211.35859

=====  
\*\*\* End of Report \*\*\*

## Compound 7 (racemic):

Data File F:\HPLC DATA 2010\KH0410\300410\_SLP SCOUT\_ KMC 2010-04-30 12-50-22\300410\_06.D

Sample Name: KMC-386-116.3

```
=====
Acq. Operator   : Karen Haggerty                Seq. Line :    5
Acq. Instrument : Instrument 1                  Location  : Vial 12
Injection Date  : 4/30/2010 3:04:07 PM          Inj       :    1
                                                Inj Volume: 5.000 µl
Different Inj Volume from Sequence !    Actual Inj Volume : 10.000 µl
Acq. Method     : C:\CHEM32\1\DATA\KH0410\300410_SLP SCOUT_ KMC 2010-04-30 12-50-22\COL1-A2+
                                                B1-NO_REF_SHORT.M
Last changed    : 3/30/2010 9:34:02 AM by Karen Haggerty
Analysis Method : F:\HPLC DATA 2010\KH0410\300410_SLP SCOUT_ KMC 2010-04-30 12-50-22\300410_
06.D\DA.M (COL1-A2+B1-NO_REF_SHORT.M)
Last changed    : 7/10/2012 1:40:19 PM by Karen Haggerty
                  (modified after loading)
Method Info     : Waters XTerra RP18 5µm, 150 x 4.6mm

Sample Info     : Waters XTerra RP18 150 x 4.6mm, 0.1% Formic Acid (aq)/M
                  eCN
=====
```

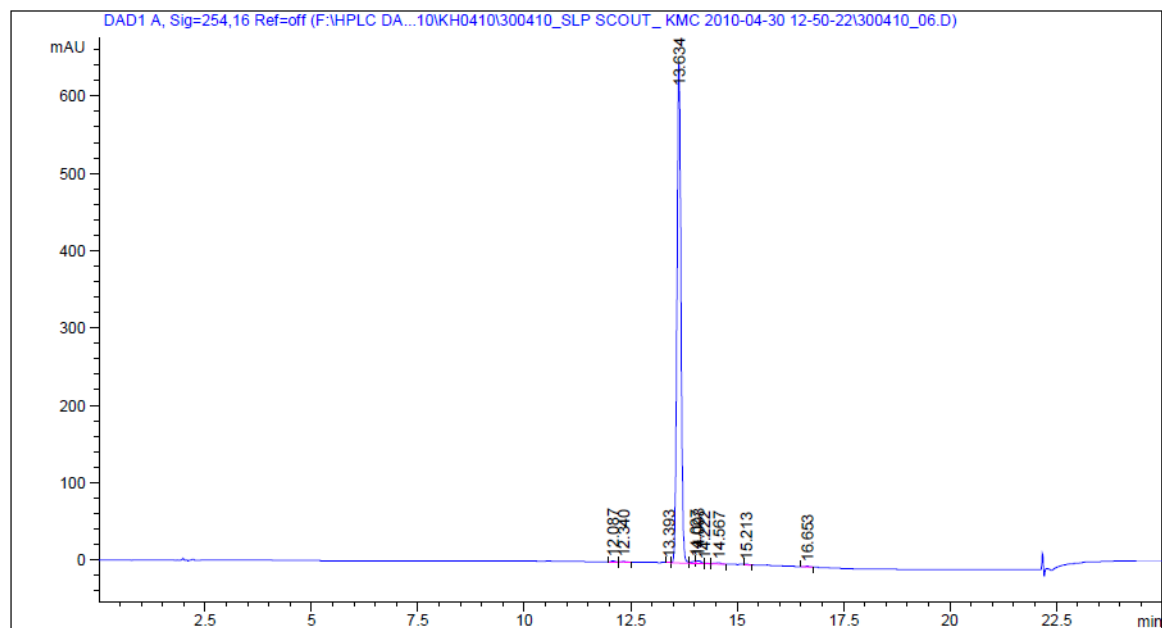

### Area Percent Report

```
=====
Sorted By      :      Signal
Multiplier:    :      1.0000
Dilution:      :      1.0000
Use Multiplier & Dilution Factor with ISTDs
=====
```

Data File F:\HPLC DATA 2010\KH0410\300410\_SLP SCOUT\_ KMC 2010-04-30 12-50-22\300410\_06.D  
Sample Name: KMC-386-116.3

Signal 1: DAD1 A, Sig=254,16 Ref=off

| Peak # | RetTime [min] | Type | Width [min] | Area [mAU*s] | Height [mAU] | Area %  |
|--------|---------------|------|-------------|--------------|--------------|---------|
| 1      | 12.087        | MF   | 0.1117      | 9.25640      | 1.38164      | 0.2139  |
| 2      | 12.340        | FM   | 0.1380      | 6.72431      | 8.12047e-1   | 0.1554  |
| 3      | 13.393        | FM   | 0.1041      | 6.10585      | 9.77466e-1   | 0.1411  |
| 4      | 13.634        | FM   | 0.1086      | 4214.01611   | 646.77820    | 97.3922 |
| 5      | 14.027        | MF   | 0.1072      | 19.40018     | 3.01649      | 0.4484  |
| 6      | 14.093        | FM   | 0.1349      | 30.64703     | 3.78672      | 0.7083  |
| 7      | 14.222        | FM   | 0.1168      | 6.48410      | 9.25445e-1   | 0.1499  |
| 8      | 14.567        | FM   | 0.1917      | 20.34799     | 1.76888      | 0.4703  |
| 9      | 15.213        | FM   | 0.1175      | 7.72732      | 1.09597      | 0.1786  |
| 10     | 16.653        | MM   | 0.1279      | 6.14077      | 8.00191e-1   | 0.1419  |

Totals : 4326.85006 661.34304

=====  
\*\*\* End of Report \*\*\*

## Compound 7(+):

Data File F:\HPLC DA...0\141010\_CHR\_LB\_TJB\_SJC\_BJC\_KMC\_CM 2010-10-15 16-22-17\141010\_091.D

Sample Name: KMC-386-116.2

```
=====
Acq. Operator   : Karen Haggerty           Seq. Line :   49
Acq. Instrument : Instrument 1             Location  : Vial 75
Injection Date  : 10/16/2010 10:31:24 AM   Inj       :    1
                                           Inj Volume: 5.000 µl
Different Inj Volume from Sequence !      Actual Inj Volume : 3.000 µl
Acq. Method     : C:\CHEM32\1\DATA\KH1010\141010_CHR_LB_TJB_SJC_BJC_KMC_CM 2010-10-15 16-22-
17\COL1-A2+B1-NO_REF_SHORT.M
Last changed    : 9/16/2010 11:21:01 AM by Karen Haggerty
Analysis Method : F:\HPLC DATA 2010\KH1010\141010_CHR_LB_TJB_SJC_BJC_KMC_CM 2010-10-15 16-22-
17\141010_091.D\DA.M (COL1-A2+B1-NO_REF_SHORT.M)
Last changed    : 7/10/2012 2:26:26 PM by Karen Haggerty
                 (modified after loading)
Method Info     : Waters XTerra RP18 5µm, 150 x 4.6mm
```

Sample Info : Waters XTerra RP18 0.1% Formic Acid (aq) / MeCN

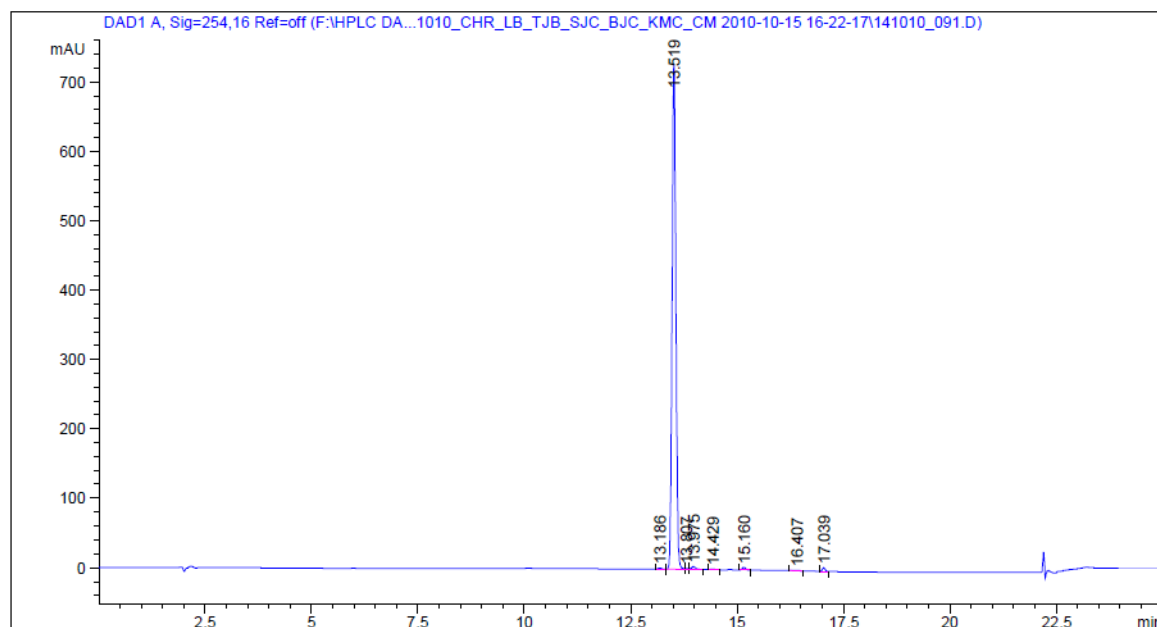

### Area Percent Report

```
=====
Sorted By      :      Signal
Multiplier:    :      1.0000
Dilution:      :      1.0000
Use Multiplier & Dilution Factor with ISTDs
```

Signal 1: DAD1 A, Sig=254,16 Ref=off

| Peak # | RetTime [min] | Type | Width [min] | Area [mAU*s] | Height [mAU] | Area %  |
|--------|---------------|------|-------------|--------------|--------------|---------|
| 1      | 13.186        | BV   | 0.0885      | 10.73960     | 1.88410      | 0.2340  |
| 2      | 13.519        | MF   | 0.1027      | 4485.07178   | 727.52887    | 97.7288 |
| 3      | 13.807        | FM   | 0.0922      | 6.39021      | 1.15576      | 0.1392  |
| 4      | 13.975        | FM   | 0.1228      | 28.36777     | 3.84857      | 0.6181  |
| 5      | 14.429        | BB   | 0.0970      | 6.94297      | 1.10905      | 0.1513  |
| 6      | 15.160        | BB   | 0.0900      | 22.17365     | 3.80530      | 0.4832  |
| 7      | 16.407        | MM   | 0.1194      | 5.74143      | 8.01265e-1   | 0.1251  |
| 8      | 17.039        | BB   | 0.0706      | 23.87838     | 5.29658      | 0.5203  |

Totals : 4589.30579 745.42948

=====  
\*\*\* End of Report \*\*\*

Compound 7(-):

Data File F:\HPLC DA...0\141010\_CHR\_LB\_TJB\_SJC\_BJC\_KMC\_CM 2010-10-15 16-22-17\141010\_061.D  
Sample Name: KMC-386-116.1

```
=====
Acq. Operator   : Karen Haggerty           Seq. Line :   34
Acq. Instrument : Instrument 1              Location  : Vial 74
Injection Date  : 10/15/2010 9:15:31 PM    Inj       :    1
                                           Inj Volume: 5.000 µl
Acq. Method     : C:\CHEM32\1\DATA\KH1010\141010_CHR_LB_TJB_SJC_BJC_KMC_CM 2010-10-15 16-22-
17\COL1-A1+B1-NO_REF_SHORT.M
Last changed    : 9/15/2010 2:24:39 PM by Karen Haggerty
Analysis Method : F:\HPLC DATA 2010\KH1010\141010_CHR_LB_TJB_SJC_BJC_KMC_CM 2010-10-15 16-22-
17\141010_061.D\DA.M (COL1-A1+B1-NO_REF_SHORT.M)
Last changed    : 7/10/2012 2:27:50 PM by Karen Haggerty
                 (modified after loading)
Sample Info     : Waters XTerra RP18 0.1% Ammonia (aq)/ MeCN
=====
```

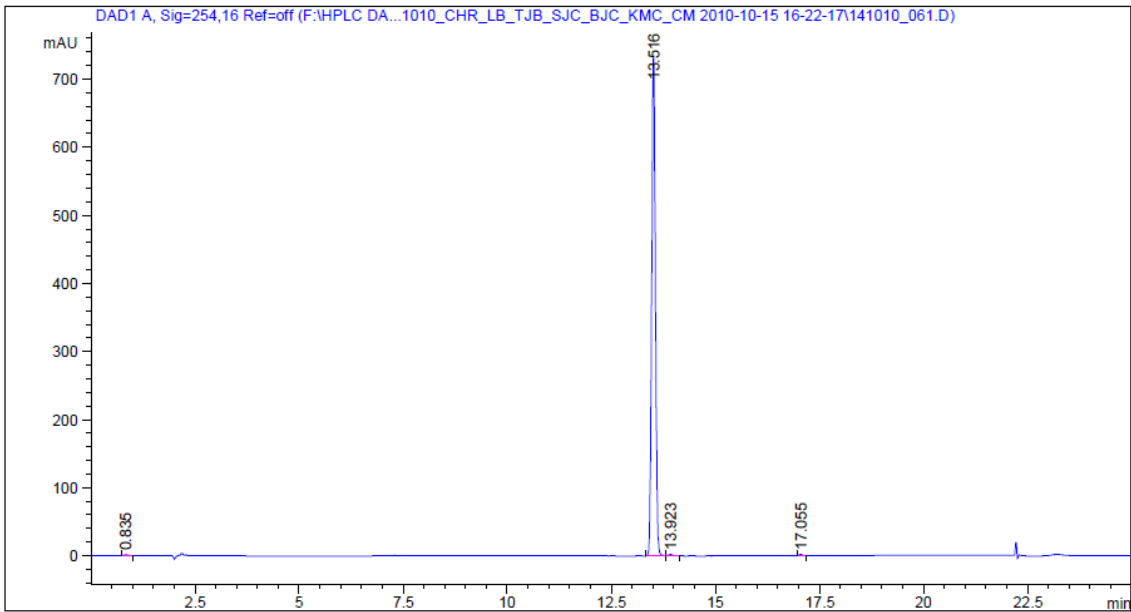

Area Percent Report

```
=====
Sorted By      :      Signal
Multiplier:    :      1.0000
Dilution:      :      1.0000
Use Multiplier & Dilution Factor with ISTDs
=====
```

Signal 1: DAD1 A, Sig=254,16 Ref=off

| Peak # | RetTime [min] | Type | Width [min] | Area [mAU*s] | Height [mAU] | Area %  |
|--------|---------------|------|-------------|--------------|--------------|---------|
| 1      | 0.835         | BB   | 0.0918      | 7.16976      | 1.07548      | 0.1558  |
| 2      | 13.516        | MF   | 0.1037      | 4569.34717   | 734.28052    | 99.2616 |
| 3      | 13.923        | MF   | 0.1365      | 17.60808     | 2.15031      | 0.3825  |

Data File F:\HPLC DA...0\141010\_CHR\_LB\_TJB\_SJC\_BJC\_KMC\_CM 2010-10-15 16-22-17\141010\_061.D  
Sample Name: KMC-386-116.1

| Peak # | RetTime [min] | Type | Width [min] | Area [mAU*s] | Height [mAU] | Area % |
|--------|---------------|------|-------------|--------------|--------------|--------|
| 4      | 17.055        | BB   | 0.0743      | 9.21538      | 1.90807      | 0.2002 |

Totals :                    4603.34039   739.41437

```
=====
*** End of Report ***
```

## Compound 8 (racemic):

Data File F:\HPLC DATA 2010\KH0910\230910\_KMC 2010-09-23 16-12-01\230910\_13.D

Sample Name: KMC-386-238

```
=====
Acq. Operator   : Karen Haggerty                      Seq. Line :    8
Acq. Instrument : Instrument 1                        Location  : Vial 62
Injection Date  : 9/23/2010 9:28:48 PM                Inj       :    1
                                                Inj Volume: 5.000 µl
Different Inj Volume from Sequence !    Actual Inj Volume : 10.000 µl
Acq. Method     : C:\CHEM32\1\DATA\KH0910\230910_KMC 2010-09-23 16-12-01\COL1-A1+B1-NO_REF_
                                                SHORT.M
Last changed    : 9/15/2010 2:24:39 PM by Karen Haggerty
Analysis Method : F:\HPLC DATA 2010\KH0910\230910_KMC 2010-09-23 16-12-01\230910_13.D\DA.M (
                                                COL1-A1+B1-NO_REF_SHORT.M)
Last changed    : 7/10/2012 2:58:45 PM by Karen Haggerty
                                                (modified after loading)
Sample Info     : Waters XTerra RP18 0.1% Ammonia/MeCN
=====
```

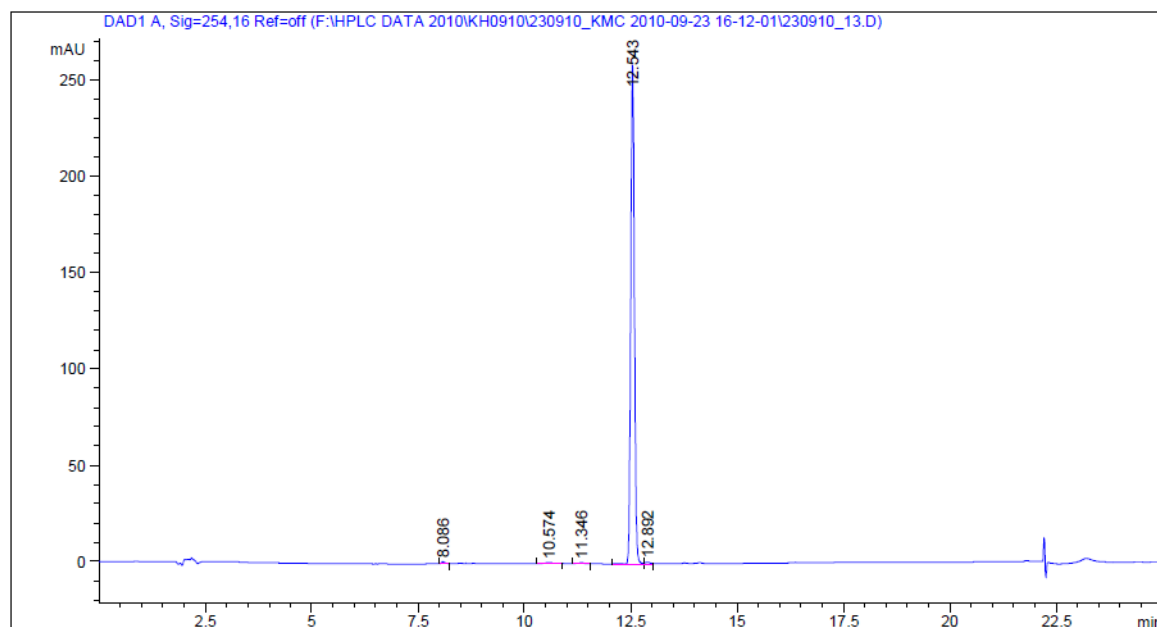

### Area Percent Report

```
=====
Sorted By      :      Signal
Multiplier:    :      1.0000
Dilution:      :      1.0000
Use Multiplier & Dilution Factor with ISTDs
=====
```

Signal 1: DAD1 A, Sig=254,16 Ref=off

| Peak # | RetTime [min] | Type | Width [min] | Area [mAU*s] | Height [mAU] | Area % |
|--------|---------------|------|-------------|--------------|--------------|--------|
| 1      | 8.086         | MF   | 0.1036      | 6.15895      | 9.91064e-1   | 0.3876 |
| 2      | 10.574        | MF   | 0.3555      | 10.84812     | 5.08599e-1   | 0.6826 |

Data File F:\HPLC DATA 2010\KH0910\230910\_KMC 2010-09-23 16-12-01\230910\_13.D  
Sample Name: KMC-386-238

| Peak #   | RetTime [min] | Type | Width [min] | Area [mAU*s] | Height [mAU] | Area %  |
|----------|---------------|------|-------------|--------------|--------------|---------|
| 3        | 11.346        | MF   | 0.1957      | 6.93036      | 5.90120e-1   | 0.4361  |
| 4        | 12.543        | MF   | 0.0999      | 1557.37878   | 259.81110    | 98.0004 |
| 5        | 12.892        | MF   | 0.1357      | 7.83997      | 9.62881e-1   | 0.4933  |
| Totals : |               |      |             | 1589.15619   | 262.86376    |         |

=====  
\*\*\* End of Report \*\*\*

## Compound 8 (-):

Data File F:\HPLC DATA 2010\KH1110\101110\_BJC\_KMC\_CM\_DT\_LB 2010-11-10 15-08-53\101110\_04.D

Sample Name: KMC-386-240.1

```
=====
Acq. Operator   : Karen Haggerty                Seq. Line :    4
Acq. Instrument : Instrument 1                  Location  : Vial 3
Injection Date  : 11/10/2010 4:28:06 PM          Inj       :    1
                                                Inj Volume: 5.000 µl
Different Inj Volume from Sequence !    Actual Inj Volume : 1.000 µl
Acq. Method     : C:\CHEM32\1\DATA\KH1110\101110_BJC_KMC_CM_DT_LB 2010-11-10 15-08-53\COL1-
A2+B1-NO_REF_SHORT.M
Last changed    : 9/16/2010 11:21:01 AM by Karen Haggerty
Analysis Method : F:\HPLC DATA 2010\KH1110\101110_BJC_KMC_CM_DT_LB 2010-11-10 15-08-53\
101110_04.D\DA.M (COL1-A2+B1-NO_REF_SHORT.M)
Last changed    : 7/10/2012 2:49:03 PM by Karen Haggerty
                (modified after loading)
Method Info     : Waters XTerra RP18 5µm, 150 x 4.6mm
=====
```

Sample Info : Waters XTerra RP18 0.1% Formic Acid (aq) / MeCN

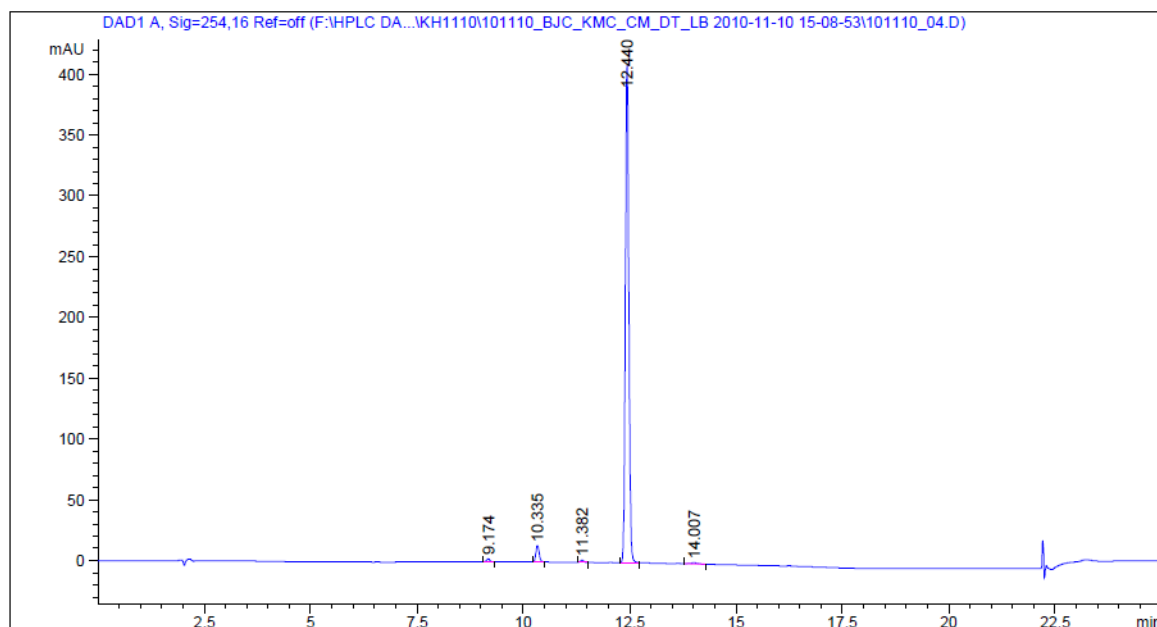

### Area Percent Report

```
=====
Sorted By      :      Signal
Multiplier:    :      1.0000
Dilution:      :      1.0000
Use Multiplier & Dilution Factor with ISTDs
=====
```

Data File F:\HPLC DATA 2010\KH1110\101110\_BJC\_KMC\_CM\_DT\_LB 2010-11-10 15-08-53\101110\_04.D  
Sample Name: KMC-386-240.1

Signal 1: DAD1 A, Sig=254,16 Ref=off

| Peak # | RetTime [min] | Type | Width [min] | Area [mAU*s] | Height [mAU] | Area %  |
|--------|---------------|------|-------------|--------------|--------------|---------|
| 1      | 9.174         | BB   | 0.0838      | 12.88767     | 2.35633      | 0.5252  |
| 2      | 10.335        | BB   | 0.0828      | 72.77117     | 13.52690     | 2.9655  |
| 3      | 11.382        | BB   | 0.0894      | 10.93016     | 1.89234      | 0.4454  |
| 4      | 12.440        | BB   | 0.0906      | 2344.70728   | 410.58762    | 95.5502 |
| 5      | 14.007        | BB   | 0.1488      | 12.60383     | 1.14170      | 0.5136  |

Totals : 2453.90011 429.50489

=====  
\*\*\* End of Report \*\*\*

Compound 8 (+):

Data File F:\HPLC DATA 2010\KH1110\101110\_BJC\_KMC\_CM\_DT\_LB 2010-11-10 15-08-53\101110\_36.D  
Sample Name: KMC-386-240.2

```
=====
Acq. Operator   : Karen Haggerty                      Seq. Line :   21
Acq. Instrument : Instrument 1                        Location  : Vial 4
Injection Date  : 11/11/2010 6:37:00 AM              Inj       :    1
                                                    Inj Volume: 5.000 µl
Different Inj Volume from Sequence !    Actual Inj Volume : 1.000 µl
Acq. Method     : C:\CHEM32\1\DATA\KH1110\101110_BJC_KMC_CM_DT_LB 2010-11-10 15-08-53\COL1-
                  A1+B1-NO_REF_SHORT.M
Last changed    : 9/15/2010 2:24:39 PM by Karen Haggerty
Analysis Method : F:\HPLC DATA 2010\KH1110\101110_BJC_KMC_CM_DT_LB 2010-11-10 15-08-53\
                  101110_36.D\DA.M (COL1-A1+B1-NO_REF_SHORT.M)
Last changed    : 7/10/2012 2:50:33 PM by Karen Haggerty
                  (modified after loading)
Sample Info     : Waters XTerra RP18 0.1% Ammonia (aq) / MeCN
=====
```

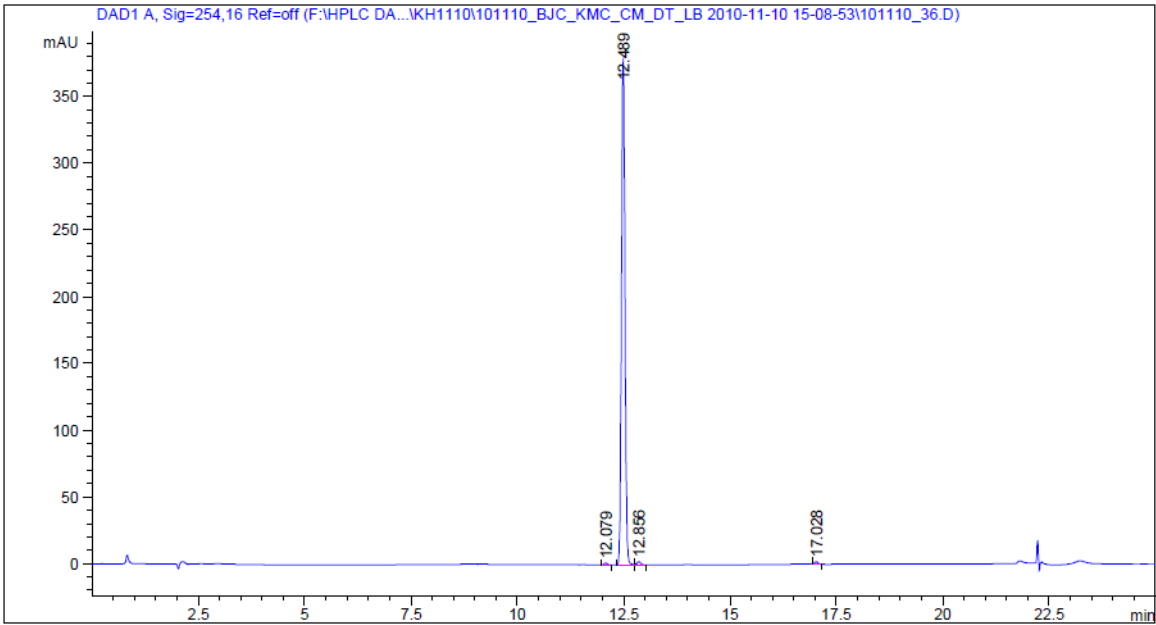

```
=====
                        Area Percent Report
=====
Sorted By      :      Signal
Multiplier:    :      1.0000
Dilution:      :      1.0000
Use Multiplier & Dilution Factor with ISTDs
```

Signal 1: DAD1 A, Sig=254,16 Ref=off

| Peak # | RetTime [min] | Type | Width [min] | Area [mAU*s] | Height [mAU] | Area %  |
|--------|---------------|------|-------------|--------------|--------------|---------|
| 1      | 12.079        | BB   | 0.0784      | 6.34116      | 1.26646      | 0.2893  |
| 2      | 12.489        | BB   | 0.0884      | 2160.08667   | 379.69702    | 98.5636 |

Data File F:\HPLC DATA 2010\KH1110\101110\_BJC\_KMC\_CM\_DT\_LB 2010-11-10 15-08-53\101110\_36.D  
Sample Name: KMC-386-240.2

| Peak #   | RetTime [min] | Type | Width [min] | Area [mAU*s] | Height [mAU] | Area % |
|----------|---------------|------|-------------|--------------|--------------|--------|
| 3        | 12.856        | BB   | 0.0952      | 15.35242     | 2.44724      | 0.7005 |
| 4        | 17.028        | BB   | 0.0741      | 9.78715      | 2.03613      | 0.4466 |
| Totals : |               |      |             | 2191.56740   | 385.44684    |        |

=====  
\*\*\* End of Report \*\*\*
